# Supplementary material for: Health Effects of Whole Grains: A Bibliometric Analysis
Source: MDPI journal article supplement (doi:10.3390/foods11244094), 2022-12-18
Supplement: s1 [file s1]

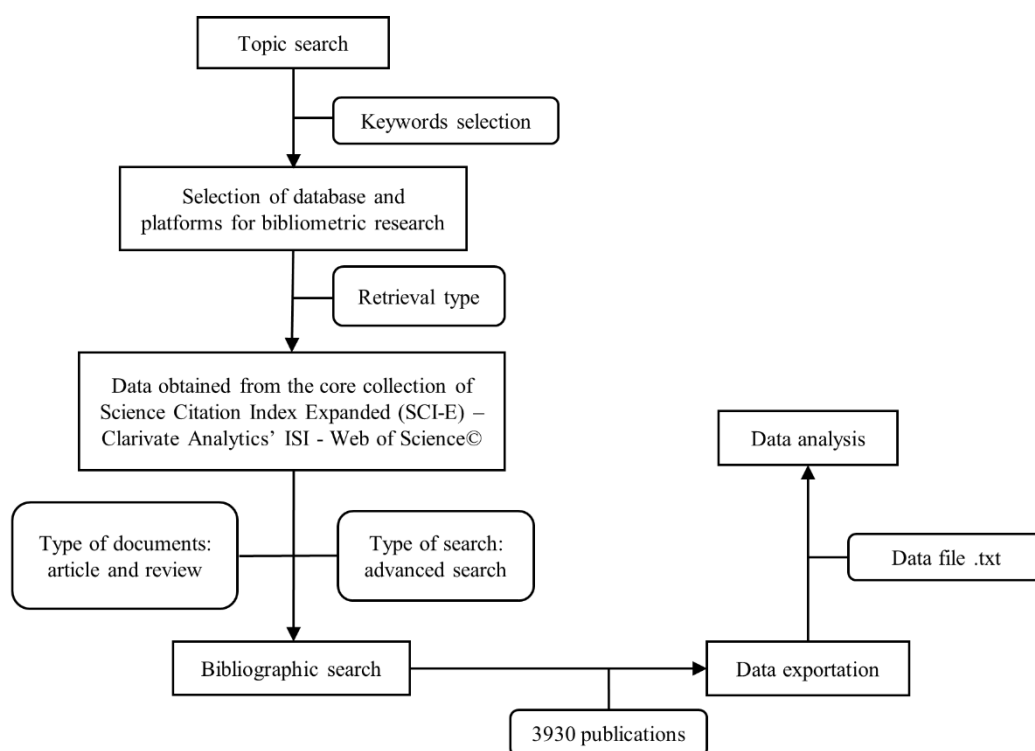

**Figure S1.** Flowsheet of the bibliometric analysis.

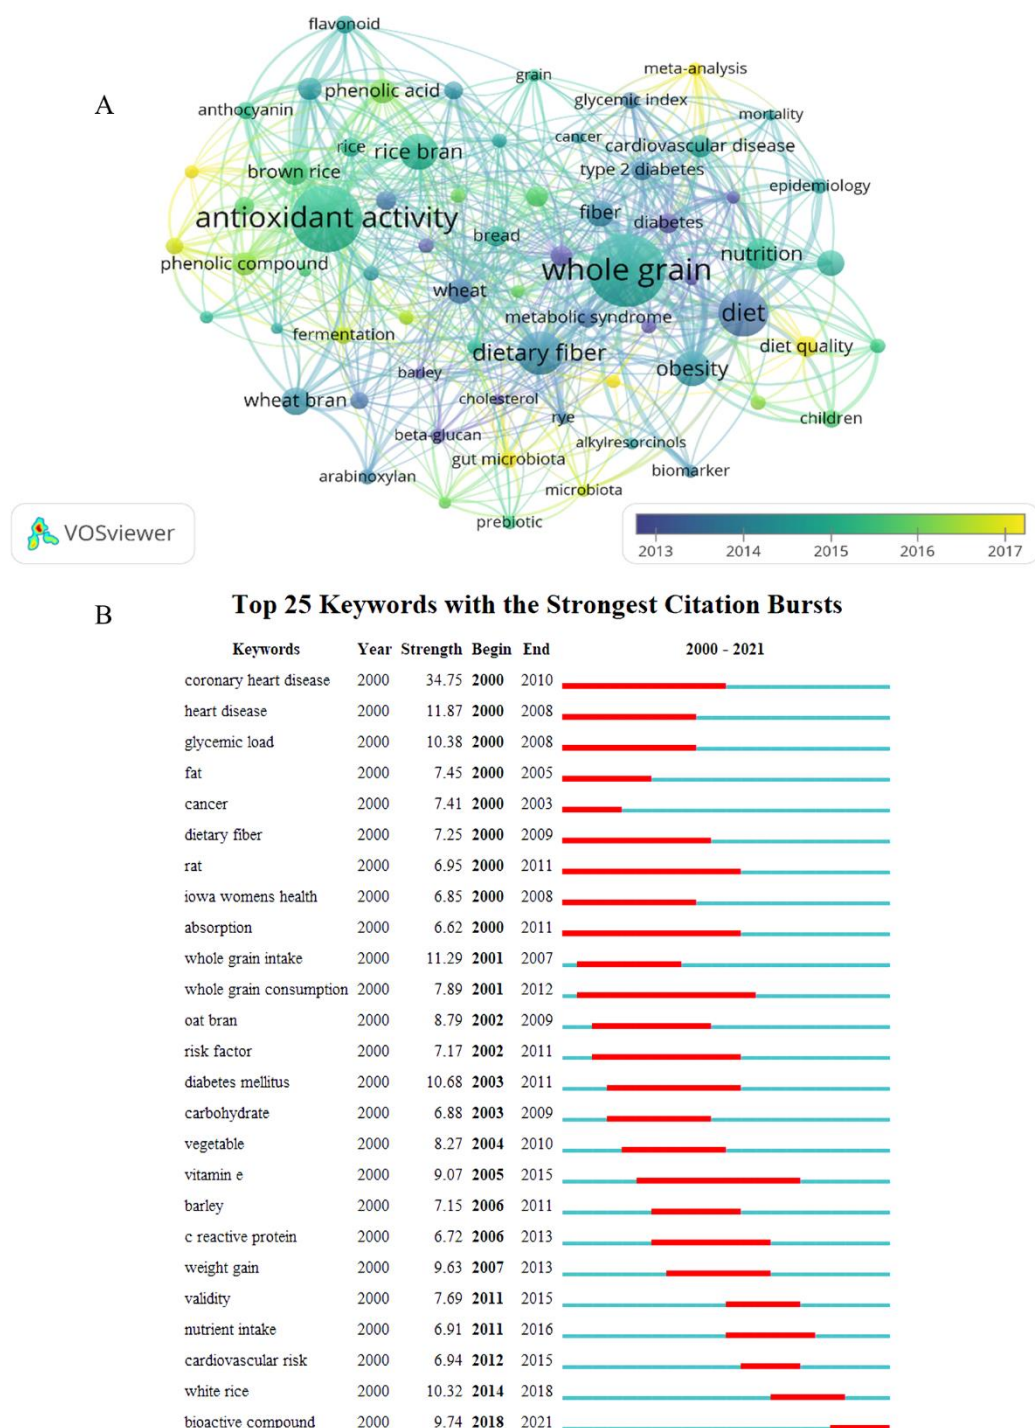

**Figure S2.** Time view of (A) keywords and (B) burst map of keywords in whole grain health studies.
